# Supplementary material for: Self-assembled macro porous ZnS–graphene aerogels for photocatalytic degradation of contaminants in water
Source: Royal Society of Chemistry journal article supplement (doi:10.1039/c4ra16494f), 2015-01-01
Supplement: c4ra16494f1.pdf [file c4ra16494f1.pdf]

# **Electronic Supplementary Information**

## **Self-assembled Macro Porous ZnS-Graphene Aerogels for Photocatalytic Degradation of Contaminants in Water**

D. Amaranatha Reddy, Jiha Choi, Seunghee Lee, Rory Ma, and Tae Kyu Kim\*

Department of Chemistry and Chemical Institute for Functional Materials, Pusan National University, Busan 609-735, Republic of Korea.

\*Corresponding Author. Email: [tkkim@pusan.ac.kr](mailto:tkkim@pusan.ac.kr)

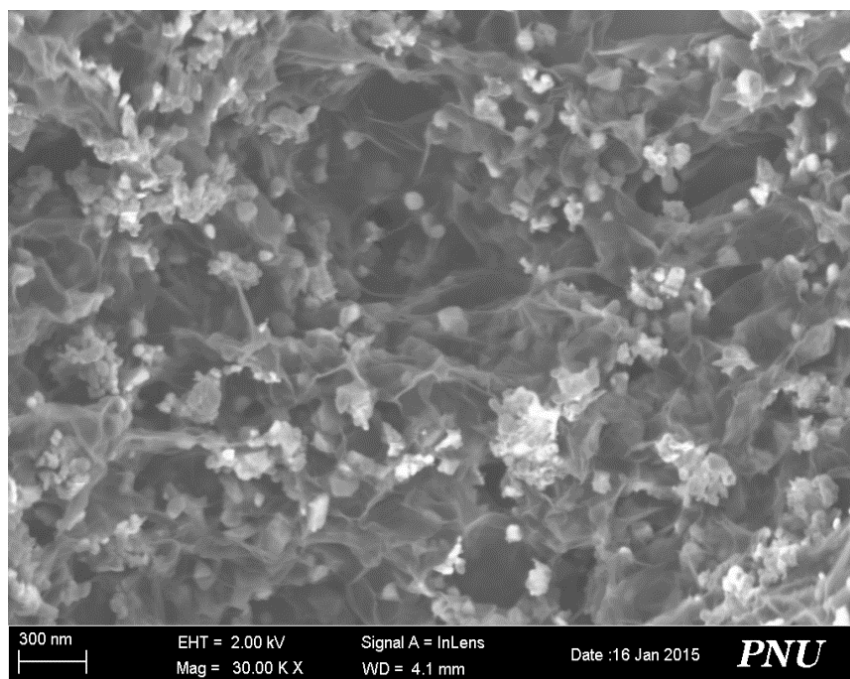

**Fig. S1** FESEM image of ZnS-GAs nanocomposite.

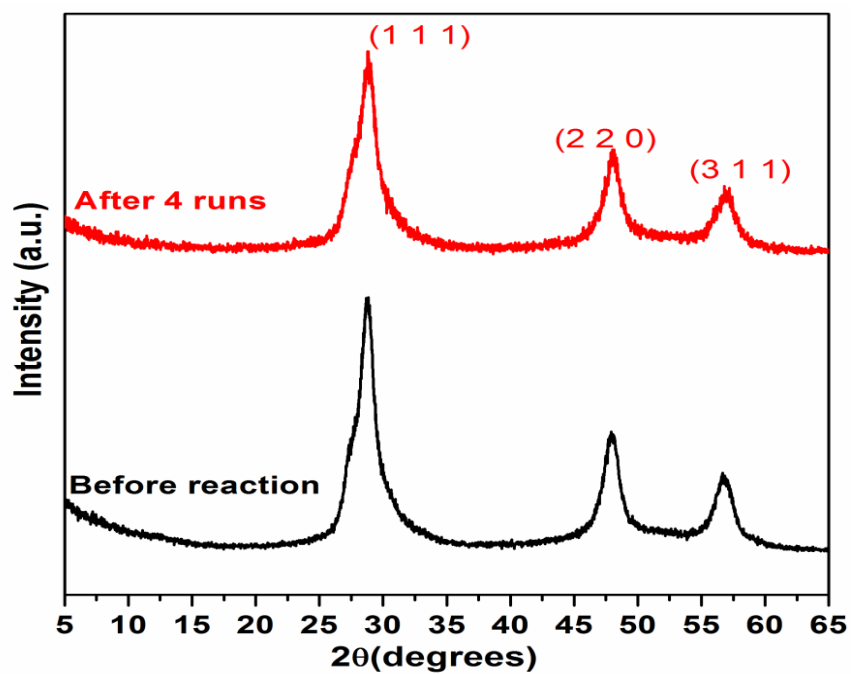

**Fig. S2** XRD patterns of ZnS/GAs nanocomposite before and after four photocatalytic runs.

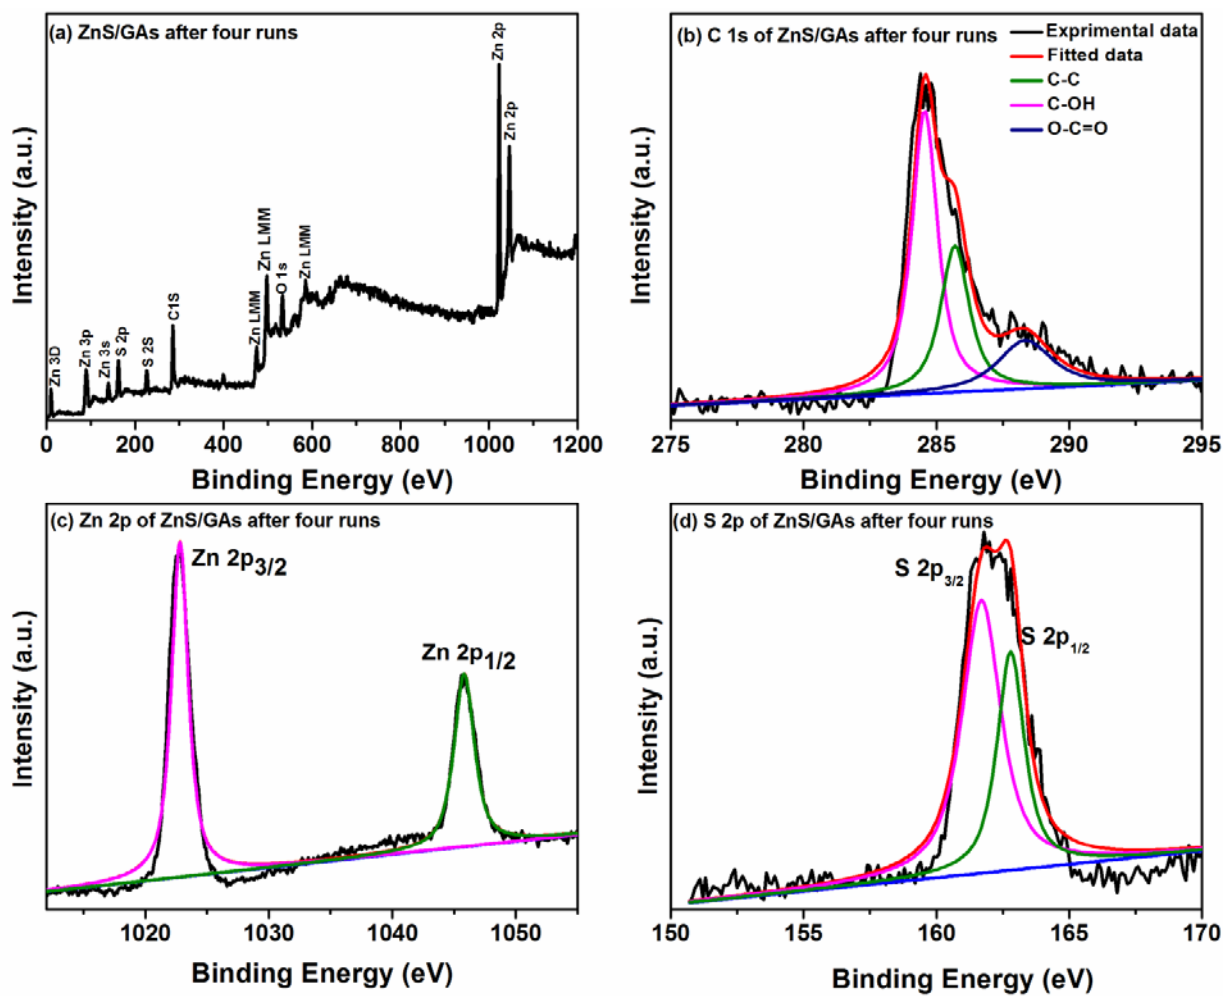

**Fig. S3** (a) XPS survey spectrum of ZnS-GAs nanocomposites after four runs under the simulated sunlight irradiation for the degradation of MB. (b) Narrow scan C 1s spectrum of ZnS-GAs nanocomposite. ((c) and (d)) Narrow scan Zn 2p and S 2p spectra of ZnS-GAs nanocomposite, respectively.
